# Supplementary material for: Enhancing Prediction Performance by Add-On Combining Circulating Tumor Cell Count, CD45neg EpCAMneg Cell Count on Colorectal Cancer, Advance, and Metastasis
Source: MDPI journal article supplement (doi:10.3390/cancers13112521), 2021-05-21
Supplement: s1 [file s1]

# Supplementary Material: Enhancing Prediction Performance by Add-on Combining Circulating Tumor Cell Count, CD45<sup>neg</sup> EpCAM<sup>neg</sup> Cell Count on Colorectal Cancer, Advance, and Metastasis

Sherry Yueh-Hsia Chiu, Chia-Hsun Hsieh, Jeng-Fu You, Po-Yu Chu, Hsin-Yuan Hung, Pao-Hsien Chu and Min-Hsien Wu

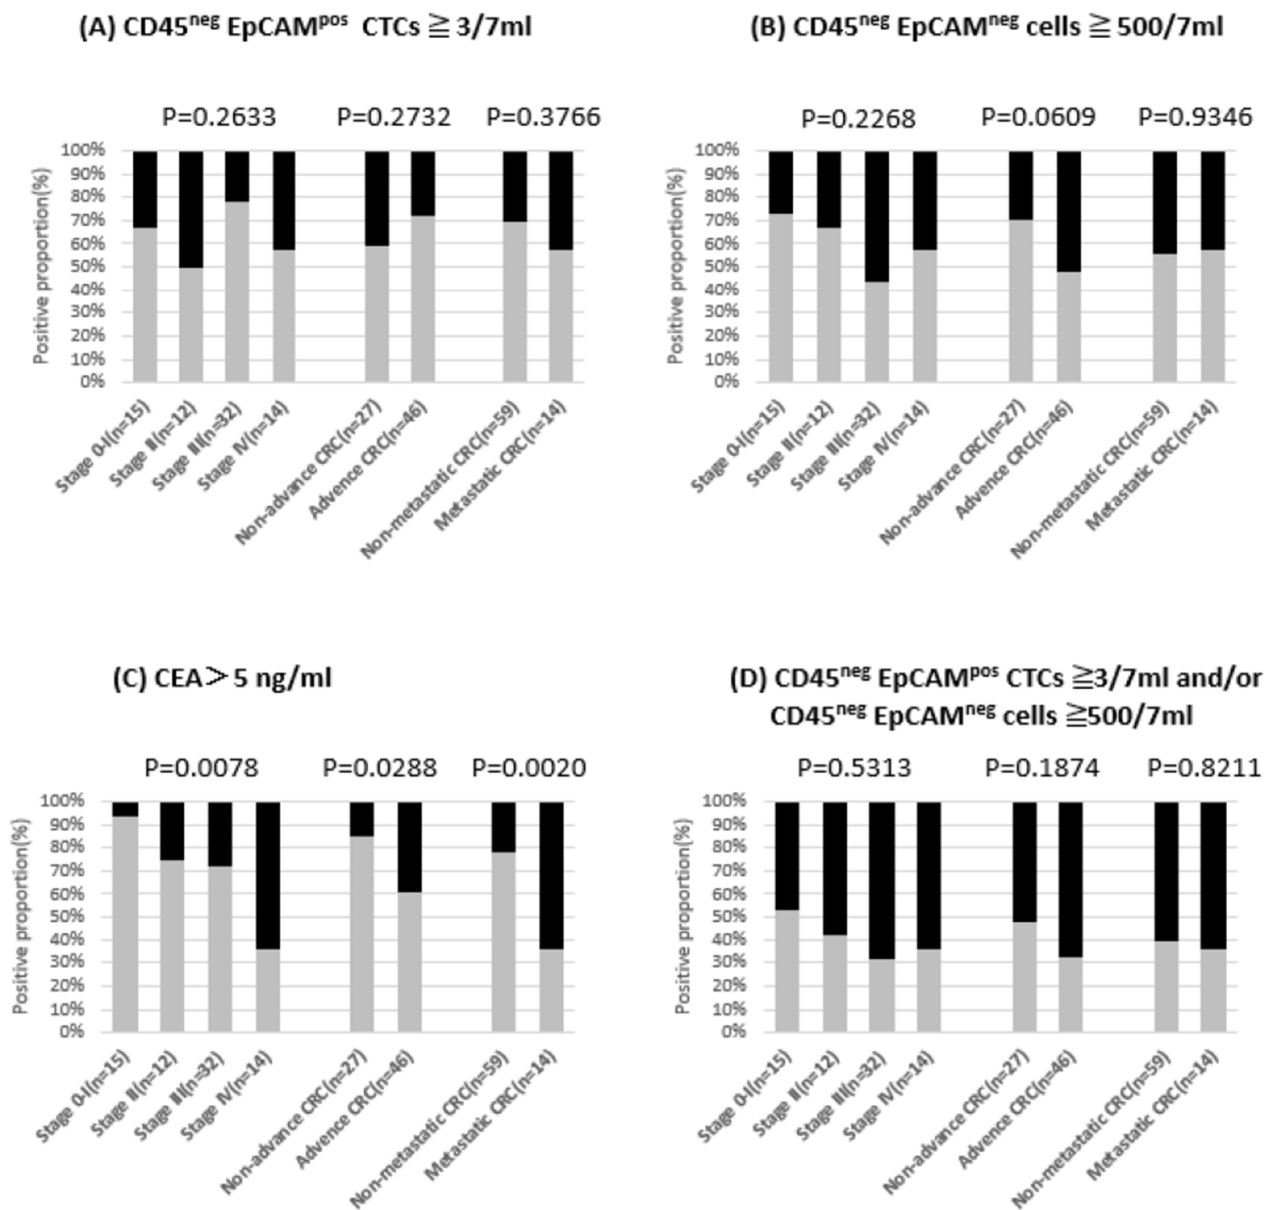

(E) CD45<sup>neg</sup> EpCAM<sup>pos</sup> CTCs  $\geq 3/7\text{ml}$  and/or CEA $>5\text{ng/ml}$

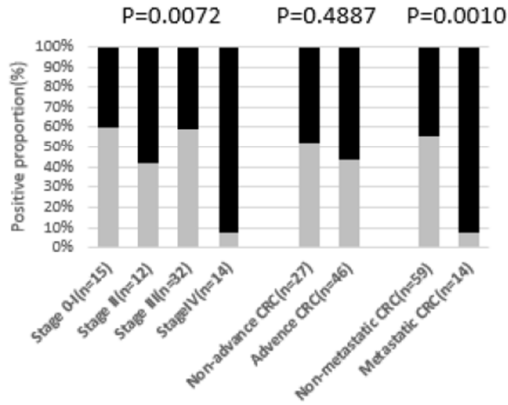

(F) CD45<sup>neg</sup> EpCAM<sup>neg</sup> cells  $\geq 500/7\text{ml}$  and/or CEA $>5\text{ng/ml}$

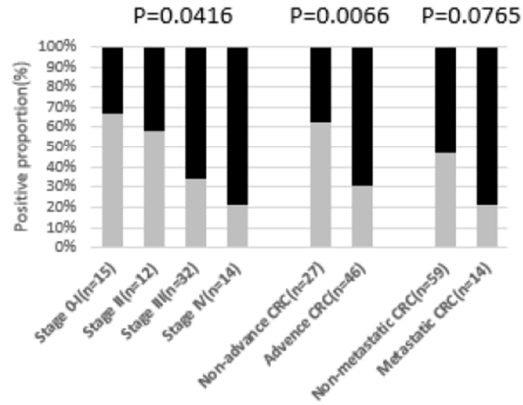

**Figure S1.** The proportional distribution comparison by advanced or metastasis statuses using single or combining different biomarkers.

**Table S1.** Performance of CEA, CD45<sup>neg</sup> EpCAM<sup>pos</sup> CTCs (continuous), CD45<sup>neg</sup> EpCAM<sup>neg</sup> ( $\geq 400$ ) cell counts, and combined biomarkers predicting advanced or metastasis CRCs.

| Biomarker(s) | Predictor(s)*                                                 |                                                                         |                      | Advanced vs.                      | Metastasis vs.                      |
|--------------|---------------------------------------------------------------|-------------------------------------------------------------------------|----------------------|-----------------------------------|-------------------------------------|
|              | CD45 <sup>neg</sup> EpCAM <sup>pos</sup><br>CTCs (continuous) | CD45 <sup>neg</sup> EpCAM <sup>neg</sup><br>cells $\geq 400/7\text{ml}$ | CEA $>5\text{ng/ml}$ | Non-advanced CRC<br>AUROC (95%CI) | Non-metastasis CRC<br>AUROC (95%CI) |
| 1-type       | √                                                             |                                                                         |                      | 0.561 (0.424, 0.699)              | 0.664 (0.497, 0.831)                |
|              |                                                               | √                                                                       |                      | 0.635 (0.491, 0.779)              | 0.630 (0.475, 0.784)                |
|              |                                                               |                                                                         | √                    | 0.643 (0.515, 0.771)              | 0.780 (0.645, 0.914)                |
| 2-type       | √                                                             | √                                                                       |                      | 0.638 (0.494, 0.781)              | 0.662 (0.495, 0.830)                |
|              |                                                               | √                                                                       | √                    | 0.712 (0.587, 0.836)              | 0.786 (0.661, 0.911)                |
|              |                                                               |                                                                         | √                    | 0.635 (0.506, 0.763)              | 0.837 (0.740, 0.934)                |
| 3-type       | √                                                             | √                                                                       | √                    | 0.710 (0.586, 0.835)              | 0.837 (0.739, 0.935)                |

\* all analysis was adjusted age (continuous) and gender. AUROC: area under the receiver operating characteristic. CEA: Carcinoembryonic Antigen.

**Table S2.** Performance of CEA, CD45neg EpCAMpos CTCs (continuous), CD45neg EpCAMneg ( $\geq 500$ ) cell counts, and combined biomarkers predicting advanced or metastasis CRCs.

| Biomarker(s) | Predictor(s)*                                              |                                                                      |              | Advanced vs.                   | Meta vs.                   |
|--------------|------------------------------------------------------------|----------------------------------------------------------------------|--------------|--------------------------------|----------------------------|
|              | CD45 <sup>neg</sup> EpCAM <sup>pos</sup> CTCs (continuous) | CD45 <sup>neg</sup> EpCAM <sup>neg</sup> cells $\geq 500/7\text{ml}$ | CEA > 5ng/ml | Non-advanced CRC AUROC (95%CI) | Non-meta CRC AUROC (95%CI) |
| 1-type       | √                                                          |                                                                      |              | 0.561(0.424, 0.699)            | 0.664(0.497, 0.831)        |
|              |                                                            | √                                                                    |              | 0.658(0.518, 0.798)            | 0.627(0.478, 0.777)        |
|              |                                                            |                                                                      | √            | 0.643(0.515, 0.771)            | 0.780(0.645, 0.914)        |
| 2-type       | √                                                          | √                                                                    |              | 0.658(0.519, 0.797)            | 0.668(0.504, 0.833)        |
|              |                                                            | √                                                                    | √            | 0.709(0.584, 0.834)            | 0.782(0.650, 0.914)        |
|              | √                                                          |                                                                      | √            | 0.635(0.506, 0.763)            | 0.837(0.740, 0.934)        |
| 3-type       | √                                                          | √                                                                    | √            | 0.710(0.585, 0.835)            | 0.826(0.706, 0.945)        |

\* all analysis was adjusted age (continuous) and gender. AUROC: area under the receiver operating characteristic. CTC: Circulating Tumor Cells.

**Table S3.** Performance of CEA, CD45neg EpCAMpos ( $\geq 3$ ) CTCs, CD45neg EpCAMneg ( $\geq 400$ ) cell counts, and combined biomarkers predicting advanced or metastasis CRCs.

| Biomarker(s) | Predictor(s)*                                                     |                                                                      |              | Advanced vs.                   | Meta vs.                   |
|--------------|-------------------------------------------------------------------|----------------------------------------------------------------------|--------------|--------------------------------|----------------------------|
|              | CD45 <sup>neg</sup> EpCAM <sup>pos</sup> CTCs $\geq 3/7\text{ml}$ | CD45 <sup>neg</sup> EpCAM <sup>neg</sup> cells $\geq 400/7\text{ml}$ | CEA > 5ng/ml | Non-advanced CRC AUROC (95%CI) | Non-meta CRC AUROC (95%CI) |
| 1-type       | √                                                                 |                                                                      |              | 0.614(0.478, 0.749)            | 0.642(0.487, 0.797)        |
|              |                                                                   | √                                                                    |              | 0.635(0.491, 0.779)            | 0.630(0.475, 0.784)        |
|              |                                                                   |                                                                      | √            | 0.643(0.515, 0.771)            | 0.780(0.645, 0.914)        |
| 2-type       | √                                                                 | √                                                                    |              | 0.672(0.542, 0.803)            | 0.639(0.473, 0.805)        |
|              |                                                                   | √                                                                    | √            | 0.712(0.587, 0.836)            | 0.786(0.661, 0.911)        |
|              | √                                                                 |                                                                      | √            | 0.677(0.554, 0.800)            | 0.815(0.710, 0.920)        |
| 3-type       | √                                                                 | √                                                                    | √            | 0.727(0.609, 0.845)            | 0.818(0.714, 0.922)        |

\* all analysis was adjusted age (continuous) and gender. AUROC: area under the receiver operating characteristic. CTC: Circulating Tumor Cells.

**Table S4.** Performance of CEA, CD45neg EpCAMpos ( $\geq 3$ ) CTCs, CD45neg EpCAMneg ( $\geq 500$ ) cell counts, and combined biomarkers predicting advanced or metastasis CRCs.

| Biomarker(s) | Predictor(s)*                            |                                                |              | Advanced vs.            | Meta vs.            |
|--------------|------------------------------------------|------------------------------------------------|--------------|-------------------------|---------------------|
|              | CD45 <sup>neg</sup> EpCAM <sup>pos</sup> | CD45 <sup>neg</sup> EpCAM <sup>neg</sup> cells | CEA > 5ng/ml | <u>Non-advanced CRC</u> | <u>Non-meta CRC</u> |
|              | CTCs $\geq 3/7\text{ml}$                 | $\geq 500/7\text{ml}$                          |              | AUROC (95%CI)           | AUROC (95%CI)       |
| 1-type       | √                                        |                                                |              | 0.614(0.478, 0.749)     | 0.642(0.487, 0.797) |
|              |                                          | √                                              |              | 0.658(0.518, 0.798)     | 0.627(0.478, 0.777) |
|              |                                          |                                                | √            | 0.643(0.515, 0.771)     | 0.780(0.645, 0.914) |
| 2-type       | √                                        | √                                              |              | 0.680(0.553, 0.807)     | 0.639(0.484, 0.794) |
|              |                                          | √                                              | √            | 0.709(0.584, 0.834)     | 0.782(0.650, 0.914) |
|              | √                                        |                                                | √            | 0.677(0.554, 0.800)     | 0.815(0.710, 0.920) |
| 3-type       | √                                        | √                                              | √            | 0.713(0.594, 0.833)     | 0.812(0.700, 0.925) |

\* all analysis was adjusted age (continuous) and gender. AUROC: area under the receiver operating characteristic. CTC: Circulating Tumor Cells.

**Table S5.** Performance of CEA, CD45neg EpCAMpos ( $\geq 3$ ) CTCs, CD45neg EpCAMneg ( $\geq 600$ ) cell counts, and combined biomarkers predicting advanced or metastasis CRCs.

| Biomarker(s) | Predictor(s)*                            |                                                |              | Advanced vs.            | Meta vs.            |
|--------------|------------------------------------------|------------------------------------------------|--------------|-------------------------|---------------------|
|              | CD45 <sup>neg</sup> EpCAM <sup>pos</sup> | CD45 <sup>neg</sup> EpCAM <sup>neg</sup> cells | CEA > 5ng/ml | <u>Non-advanced CRC</u> | <u>Non-meta CRC</u> |
|              | CTCs $\geq 3/7\text{ml}$                 | $\geq 600/7\text{ml}$                          |              | AUROC (95%CI)           | AUROC (95%CI)       |
| 1-type       | √                                        |                                                |              | 0.614(0.478, 0.749)     | 0.642(0.487, 0.797) |
|              |                                          | √                                              |              | 0.666(0.529, 0.803)     | 0.617(0.459, 0.776) |
|              |                                          |                                                | √            | 0.643(0.515, 0.771)     | 0.780(0.645, 0.914) |
| 2-type       | √                                        | √                                              |              | 0.681(0.557, 0.805)     | 0.628(0.467, 0.790) |
|              |                                          | √                                              | √            | 0.709(0.584, 0.833)     | 0.785(0.652, 0.917) |
|              | √                                        |                                                | √            | 0.677(0.554, 0.800)     | 0.815(0.710, 0.920) |
| 3-type       | √                                        | √                                              | √            | 0.717(0.598, 0.836)     | 0.816(0.705, 0.928) |

\* all analysis was adjusted age (continuous) and gender. AUROC: area under the receiver operating characteristic. CTC: Circulating Tumor Cells.
